# Supplementary material for: Novel pyridine-heterocycle hybrids: synthesis via Hantzsch and Biginelli reactions, docking simulations, and anticancer activity
Source: Royal Society of Chemistry journal article supplement (doi:10.1039/d6ra00243a), 2026-01-01
Supplement: d6ra00243a1.pdf [file d6ra00243a1.pdf]

## **Novel pyridine-heterocycle hybrids: Synthesis *via* Hantzsch and Biginelli reactions, Docking Simulations, and Anticancer Activity**

**Hadeer M. Diab,<sup>a</sup> Mostafa E. Salem,<sup>b</sup> Ahmed H. M. Elwahy,<sup>a\*</sup> Mohamed A. Ragheb,<sup>c</sup> Mahmoud A. Noamaan,<sup>d</sup> Faisal K. Algethami,<sup>b</sup> Ismail A. Abdelhamid,<sup>a\*</sup> and Huda Kamel Mahmoud<sup>a</sup>**

<sup>a</sup> *Department of Chemistry, Faculty of Science, Cairo University, Giza 12613, Egypt*

<sup>b</sup> *Chemistry Department, College of Science, Imam Mohammad Ibn Saud Islamic University (IMSIU), P.O. Box, 90905, Riyadh 11623, Saudi Arabia*

<sup>c</sup> *Department of Chemistry (Biochemistry Division), Faculty of Science, Cairo University, Giza, 12613, Egypt*

<sup>d</sup> *Department of Mathematics, Faculty of Science, Cairo University, Giza 12613, Egypt*

Email: [aelwahy@hotmail.com](mailto:aelwahy@hotmail.com), [aelwhy@cu.edu.eg](mailto:aelwhy@cu.edu.eg), [ismail\\_shafy@yahoo.com](mailto:ismail_shafy@yahoo.com),  
[ismail\\_shafy@cu.edu.eg](mailto:ismail_shafy@cu.edu.eg)

Supporting data includes <sup>1</sup>H-NMR, <sup>13</sup>C-NMR, and IR data

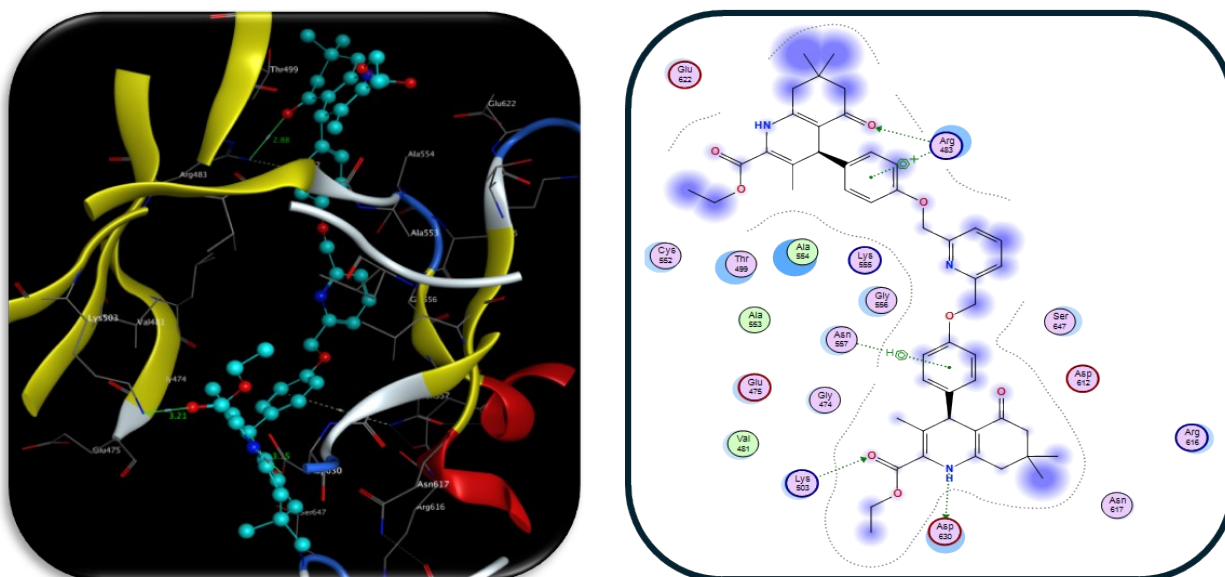

**Figure S1.** Docked compound 7 interacts with FGFR4 (PDB ID: 4XCU) in 2D (left panel) and 3D (right panel). Carbon atoms are designated turquoise, nitrogen atoms blue, and oxygen atoms red.

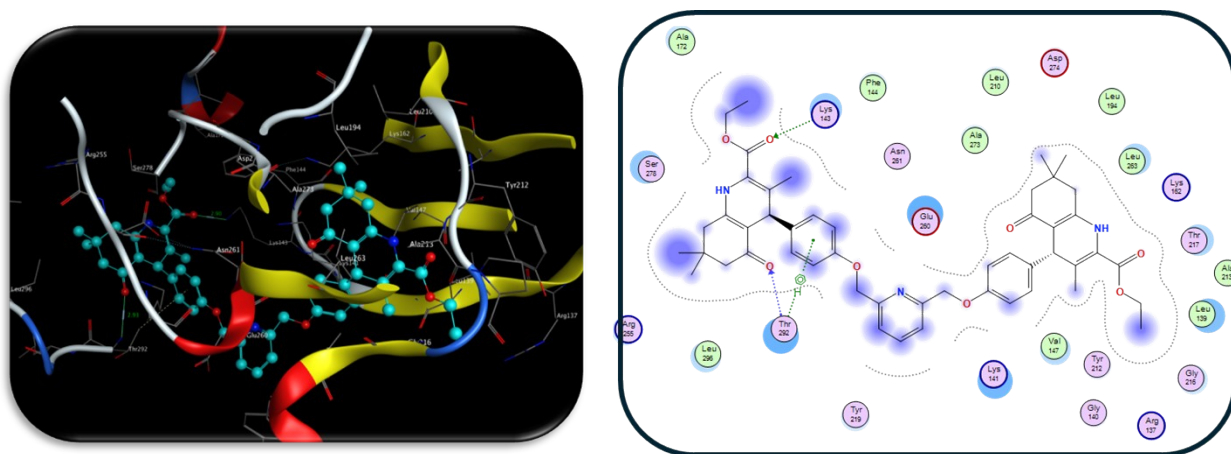

**Figure S2.** Docked compound 7 interacts with Aurora A (PDB ID: 3H0Z) in 2D (left panel) and 3D (right panel). Carbon atoms are designated turquoise, nitrogen atoms blue, and oxygen atoms red.

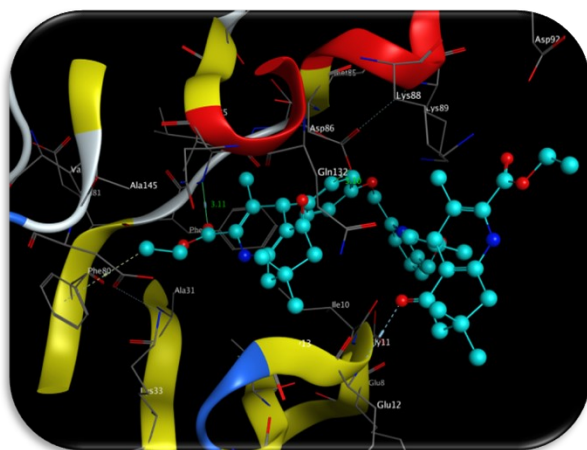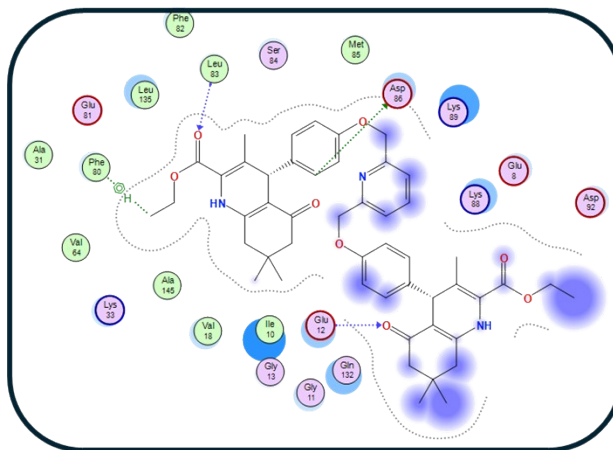

**Figure S3.** Docked compound **7** interacts with CDK1 (PDB ID: 6GU6) in 2D (left panel) and 3D (right panel). Carbon atoms are designated turquoise, nitrogen atoms blue, and oxygen atoms red.

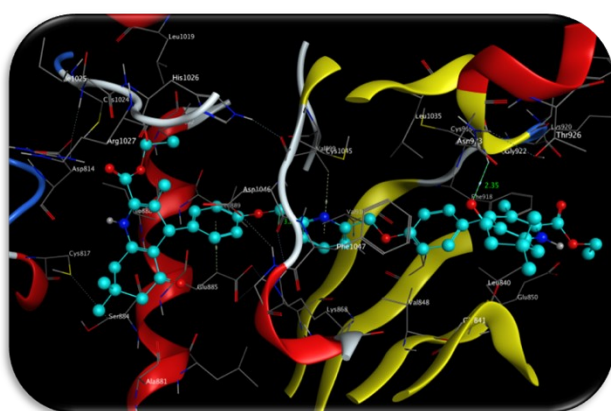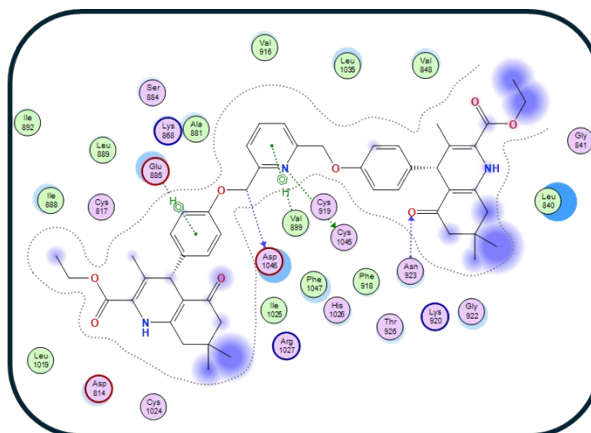

**Figure S4.** Docked compound **7** interacts with VEGFR2 (PDB ID: 3VHE) in 2D (left panel) and 3D (right panel). Carbon atoms are designated turquoise, nitrogen atoms blue, and oxygen atoms red.

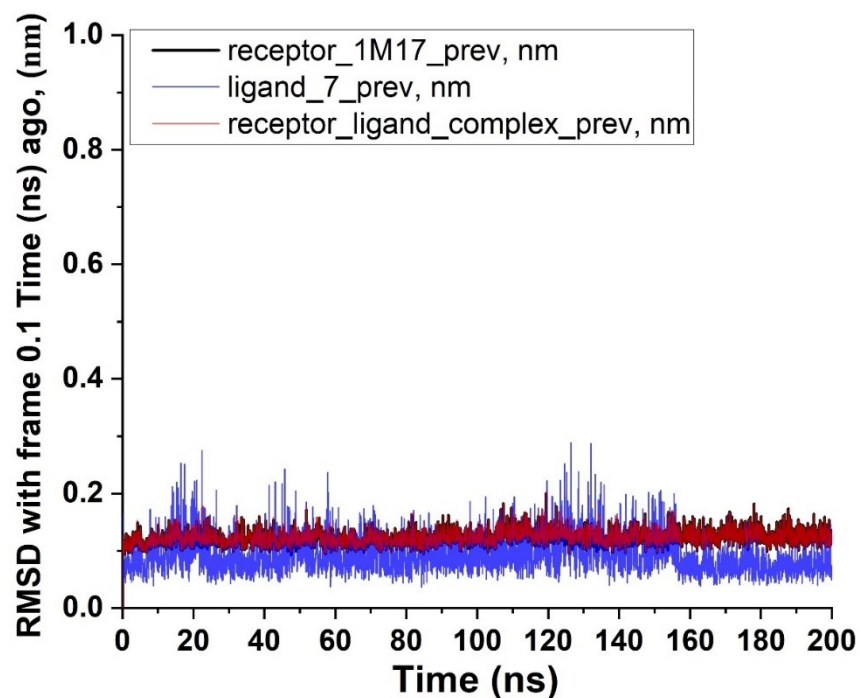

**Figure S5.** The root mean square deviation (RMSD) vs frame reference 0.1 ns ago of solvated ligand (**7**), receptor, and protein ligand complex (**7-1M17**) during 200 ns MD simulation.

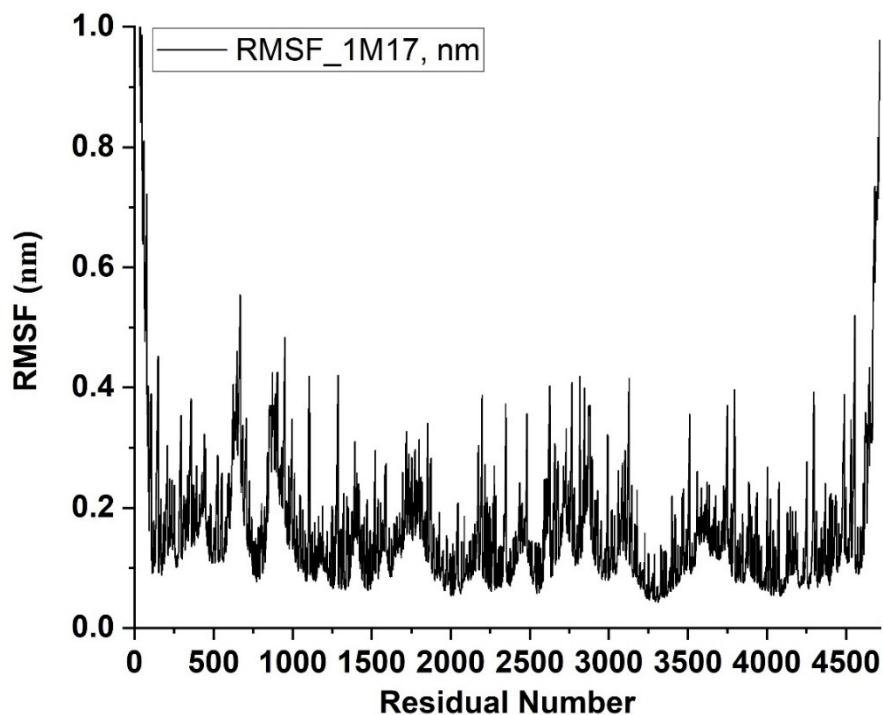

**Figure S6.** The root means square fluctuation (RMSF) of the solvated receptor complex (**1M17**) during a 200 ns MD simulation time.

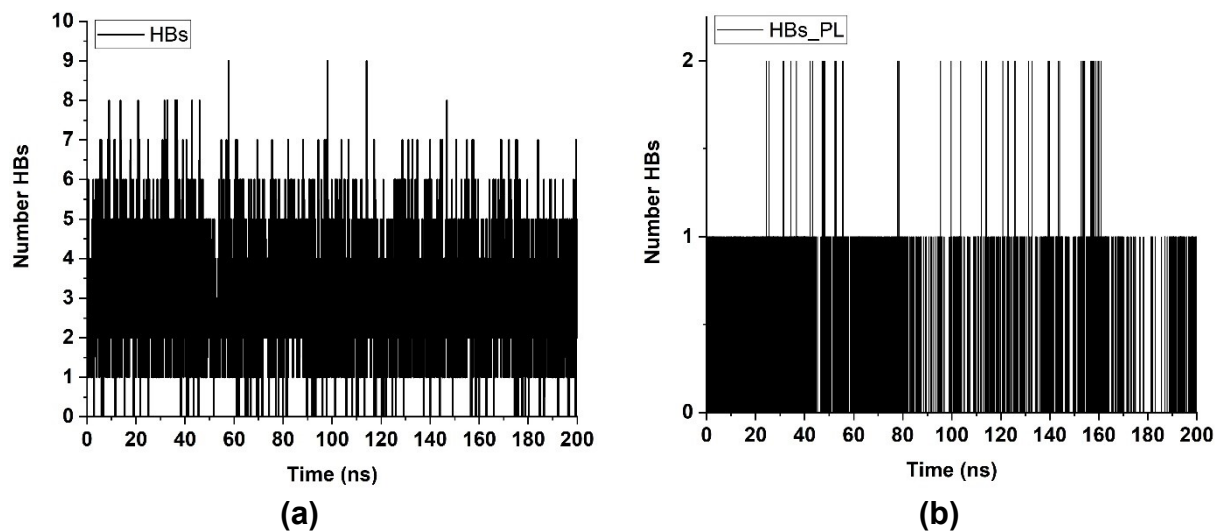

**Figure S7.** Number of average hydrogen bonding interactions between **(a)** solvated protein receptor and Ligand (**7**); **(b)** protein receptor and Ligand (**7**) only, in solvated protein complex during 200 ns MD simulation time.

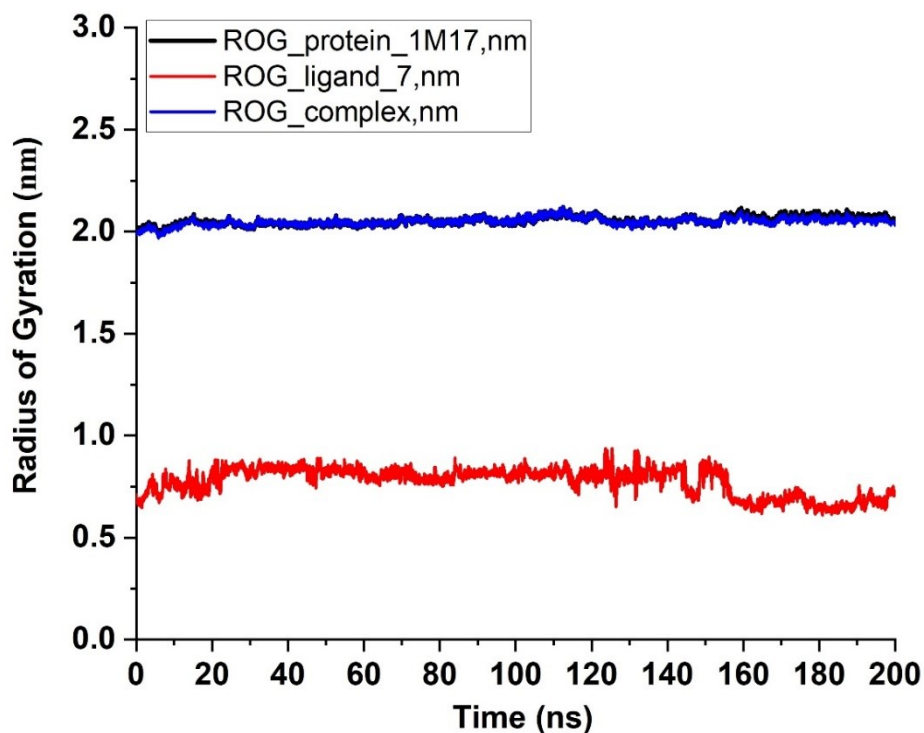

**Figure S8.** Radius of gyration (Rg) of solvated ligand (**7**), receptor and protein ligand complex (**7-1M17**) during 200 ns MD simulation time.



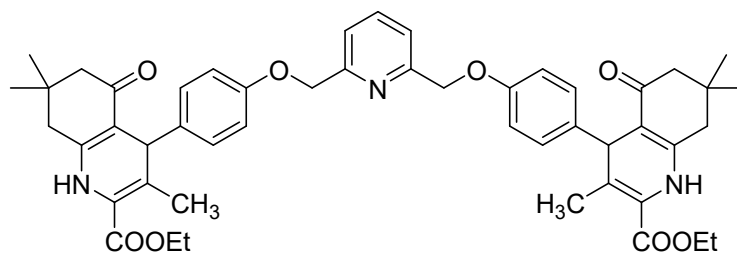

7

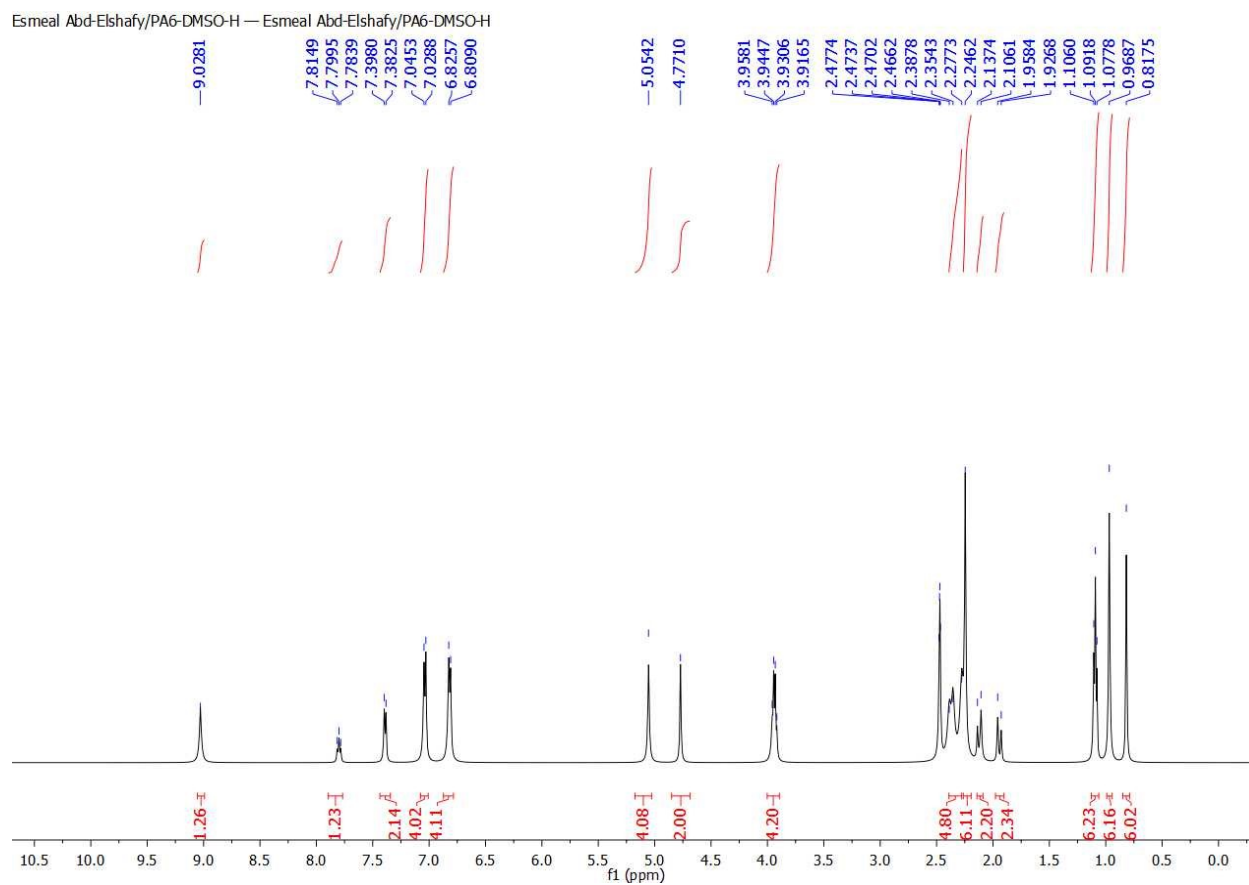

Figure S11. The <sup>1</sup>H NMR spectrum of compound 7



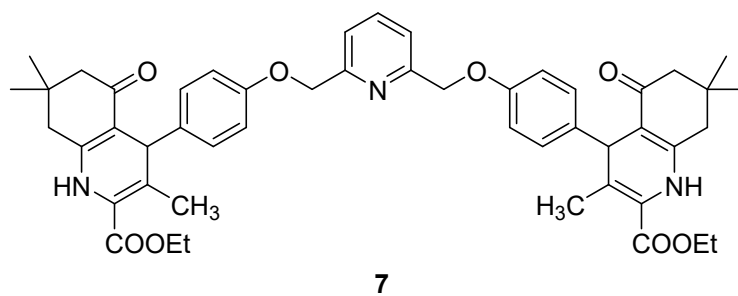

Esmeal Abd-Elshafy/C13/PA60-DMSO-C13 — Esmeal Abd-Elshafy/C13/PA60-DMSO-C13

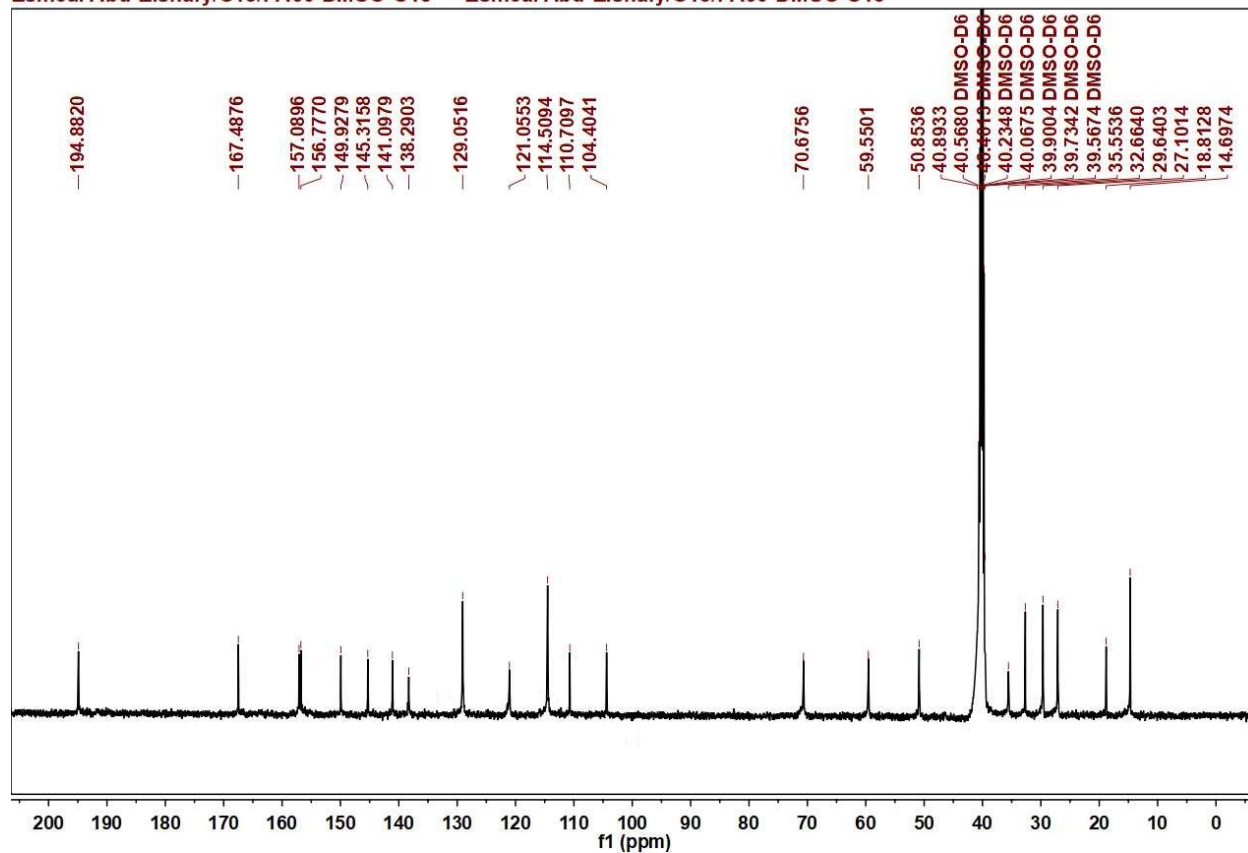

Figure S12. The  $^{13}\text{C}$  NMR spectrum of compound 7



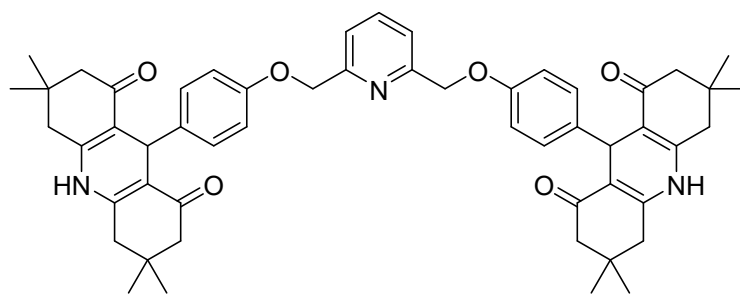

8

Esmeal Abd-Elshafy/PA5-DMSO-H — Esmeal Abd-Elshafy/PA5-DMSO-H

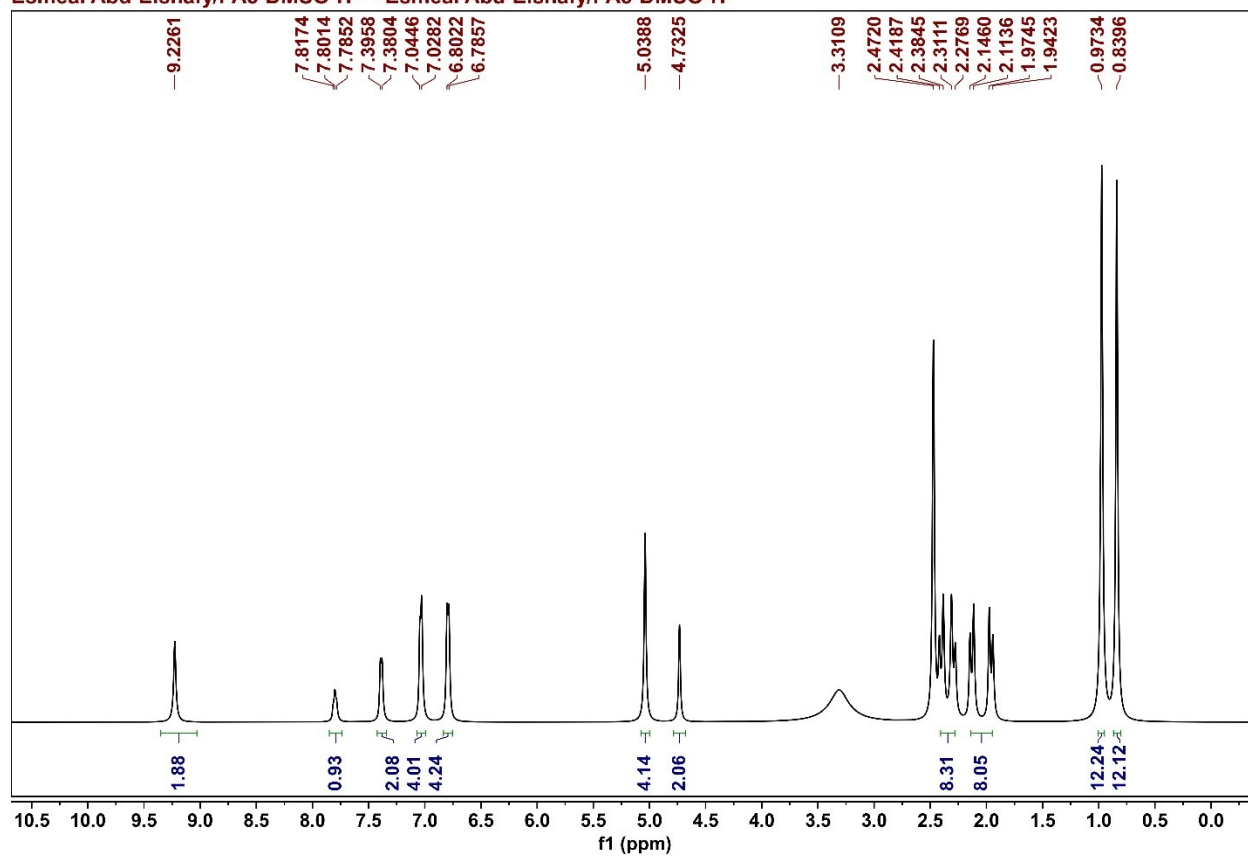

Figure S13. The  $^1\text{H}$  NMR spectrum of compound 8

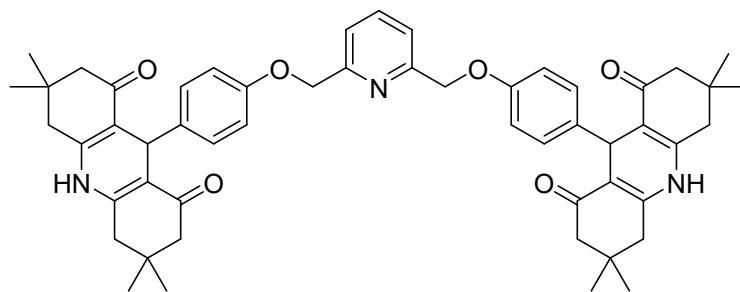

8

Esmeal Abd-Elshafy/C13/PA5-DMSO-C13 — Esmeal Abd-Elshafy/C13/PA5-DMSO-C13

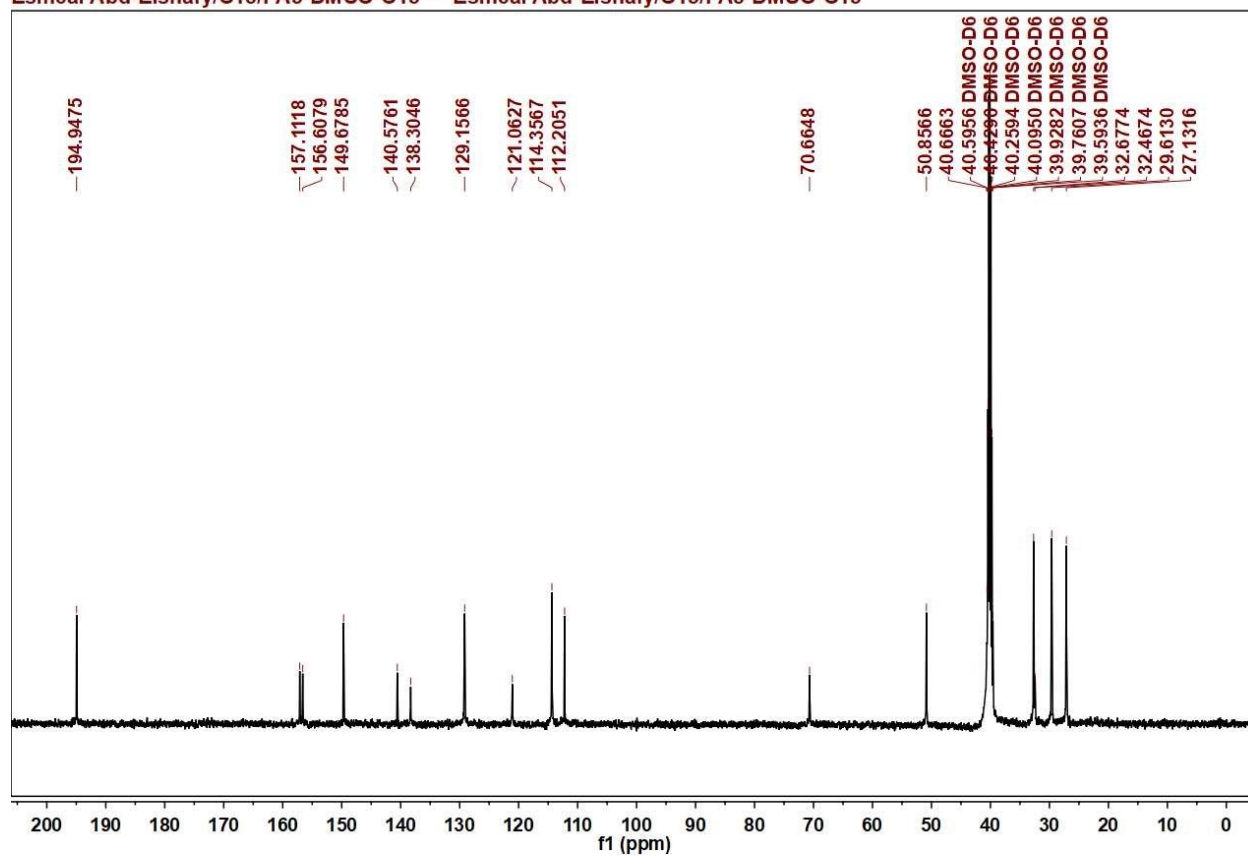

Figure S14. The  $^{13}\text{C}$  NMR spectrum of compound 8

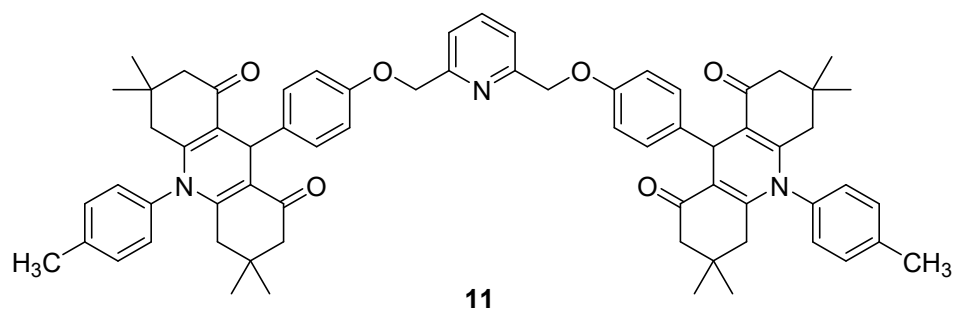

Esmeal Abd-Elshafy/PA8-DMSO-1H — Esmeal Abd-Elshafy/PA8-DMSO-1H

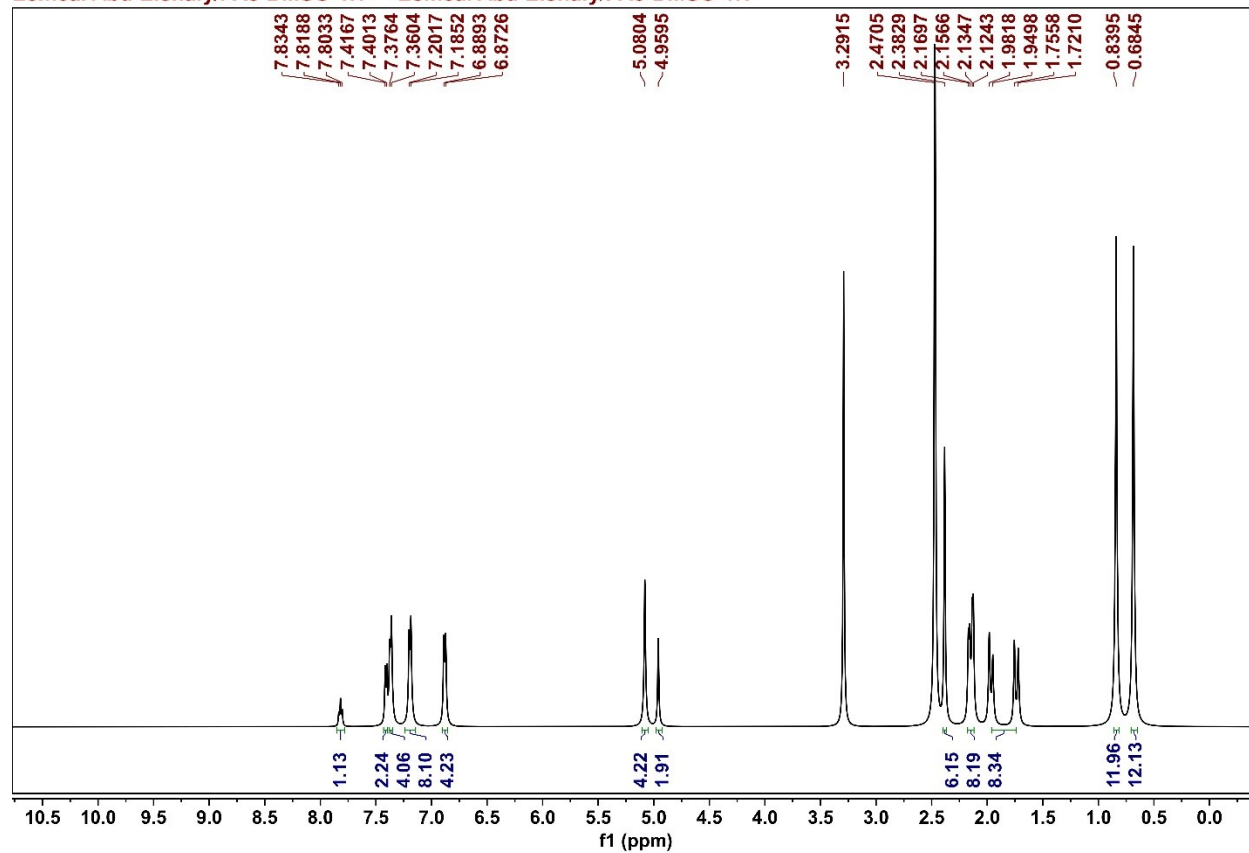

**Figure S15.** The  $^1\text{H}$  NMR spectrum of compound **11**

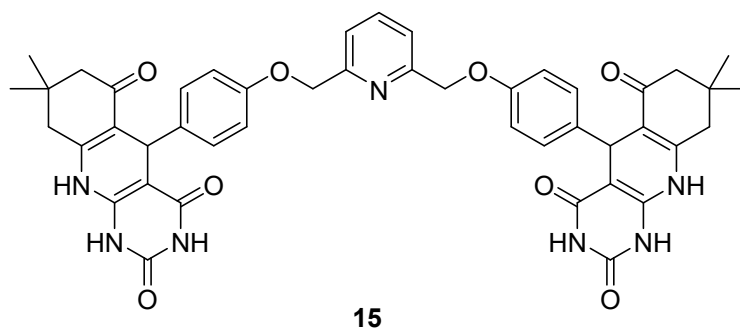

Esmeal Abd-Elshafy/PA3-DMSO-H — Esmeal Abd-Elshafy/PA3-DMSO-H

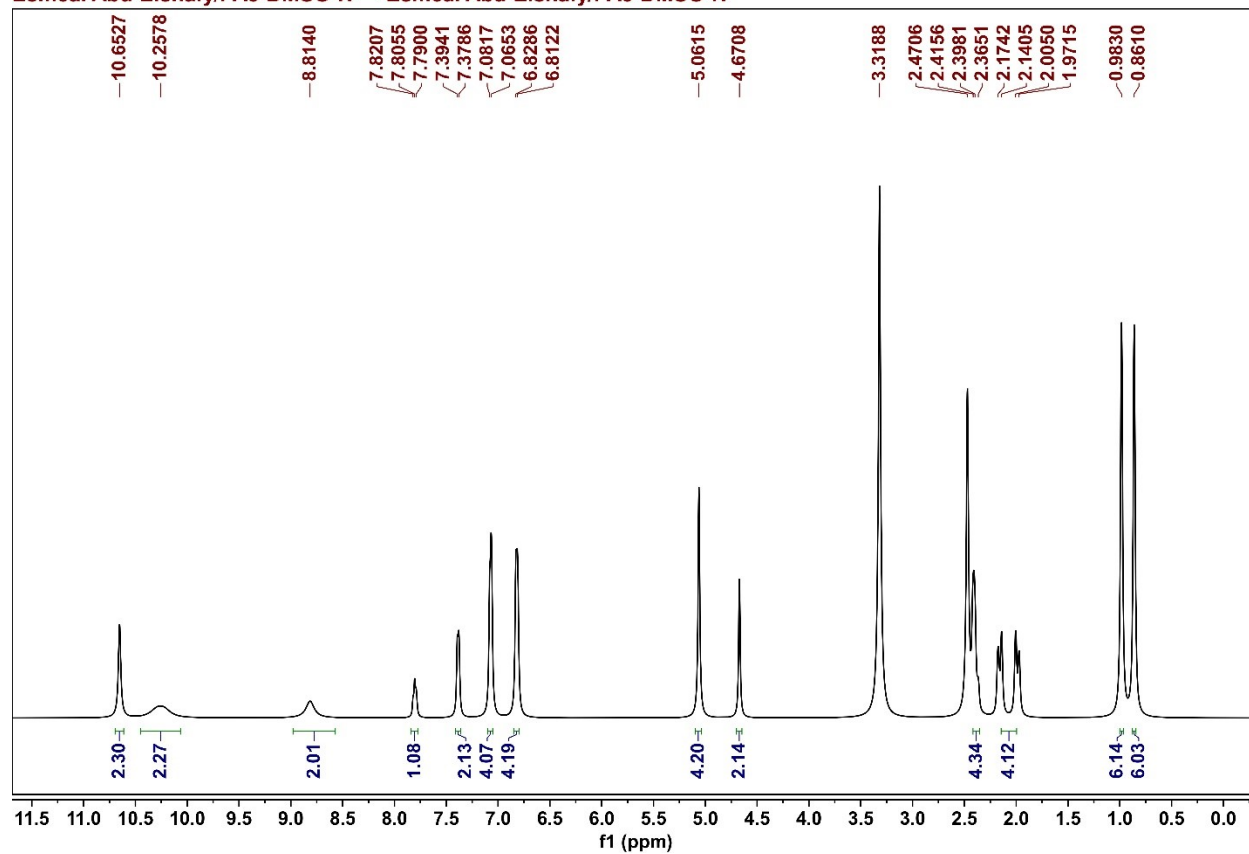

Figure S16. The  $^1\text{H}$  NMR spectrum of compound 15



Esmeal Abd-Elshafy/C13/PA3-DMSO-C13 — Esmeal Abd-Elshafy/C13/PA3-DMSO-C13

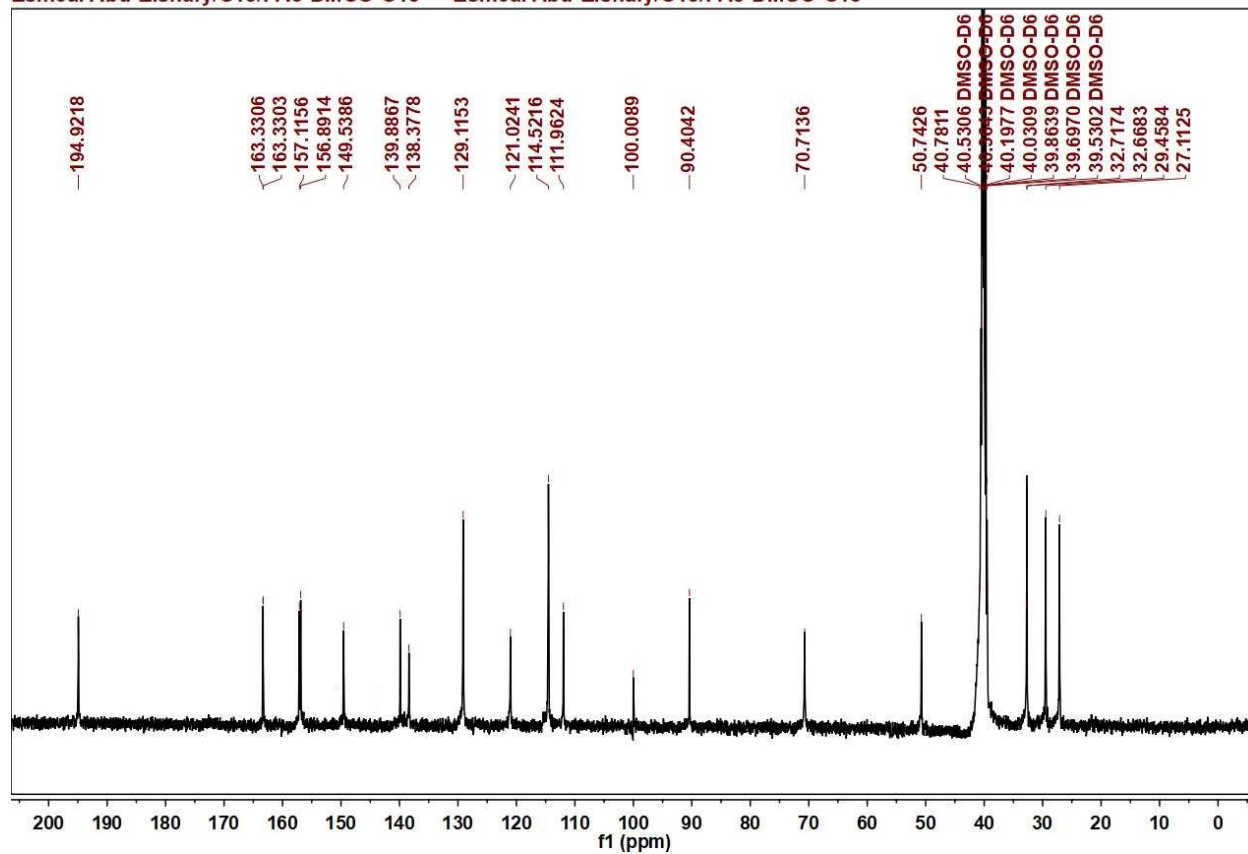

Figure S17. The  $^{13}\text{C}$  NMR spectrum of compound 15

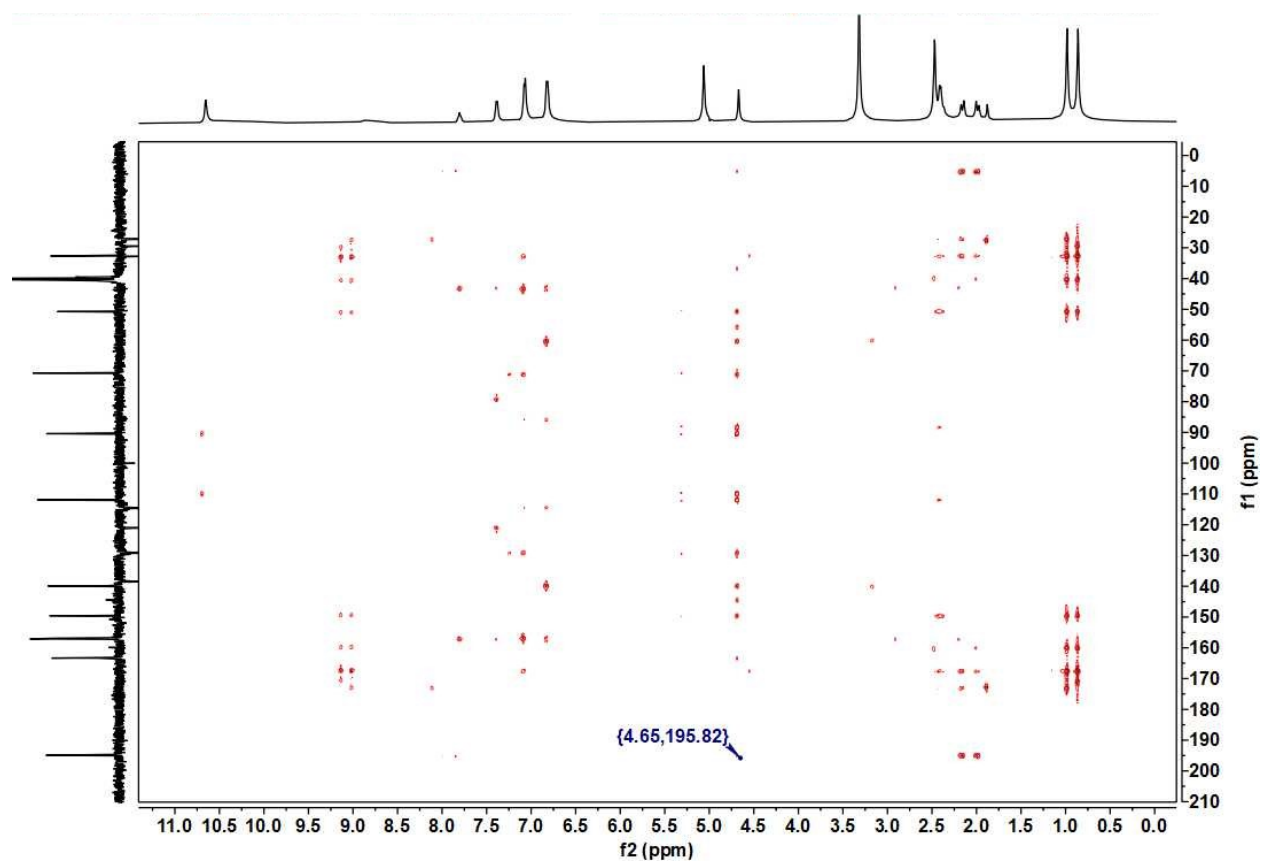

Figure S18: 2D-HMBC NMR spectrum of compound **15**

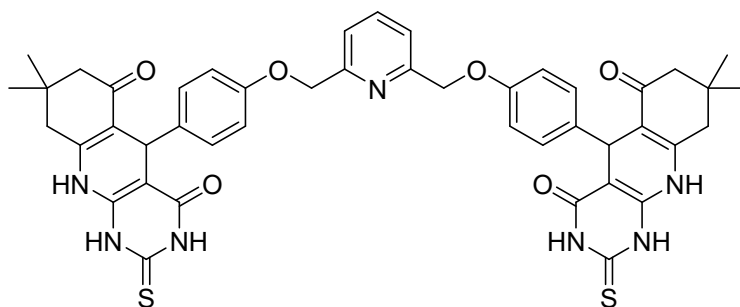

16

Esmeal Abd-Elshafy/PA2-DMSO-H — Esmeal Abd-Elshafy/PA2-DMSO-H

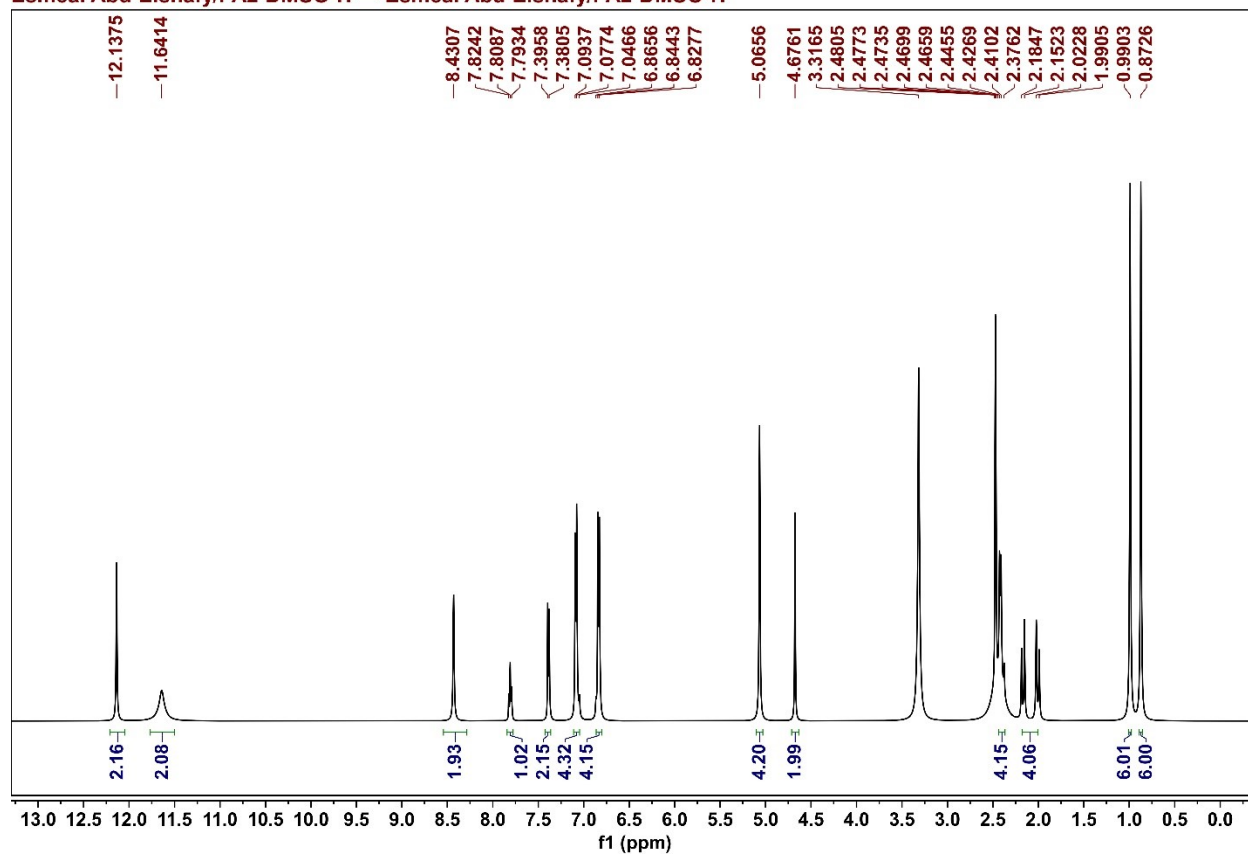

Figure S19. The  $^1\text{H}$  NMR spectrum of compound 16



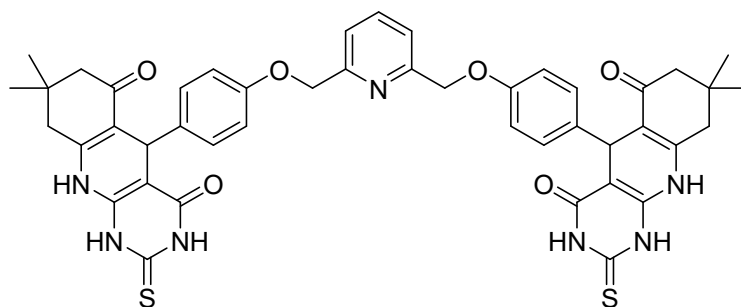

16

Esmeal Abd-Elshafy/C13/PA2-DMSO-C13 — Esmeal Abd-Elshafy/C13/PA2-DMSO-C13

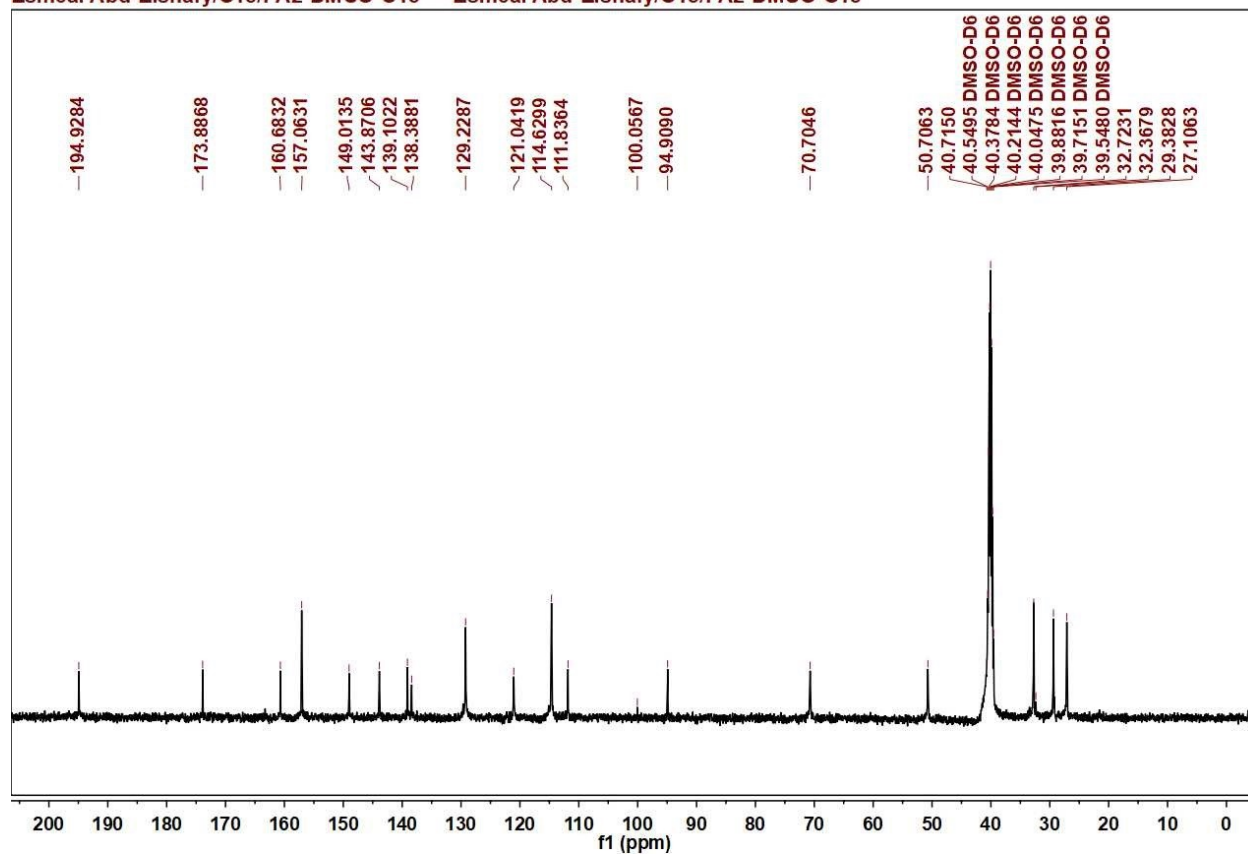

Figure S20. The  $^{13}\text{C}$  NMR spectrum of compound 16

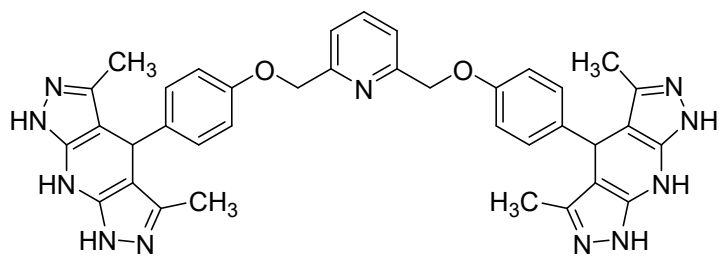

18

Esmeal Abd-Elshafy/PA11-DMSO-1H — Esmeal Abd-Elshafy/PA11-DMSO-1H

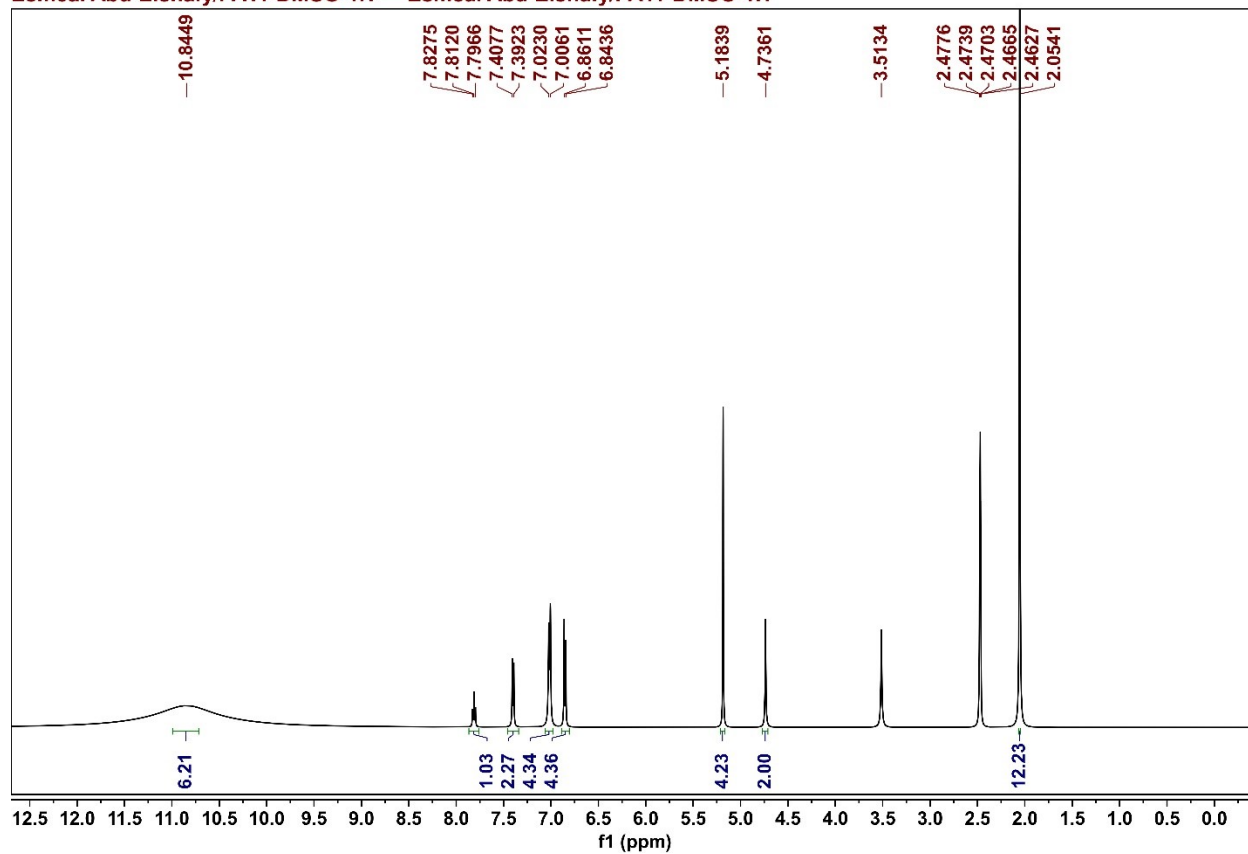

Figure S21. The  $^1\text{H}$  NMR spectrum of compound 18

## IR Spectra



7

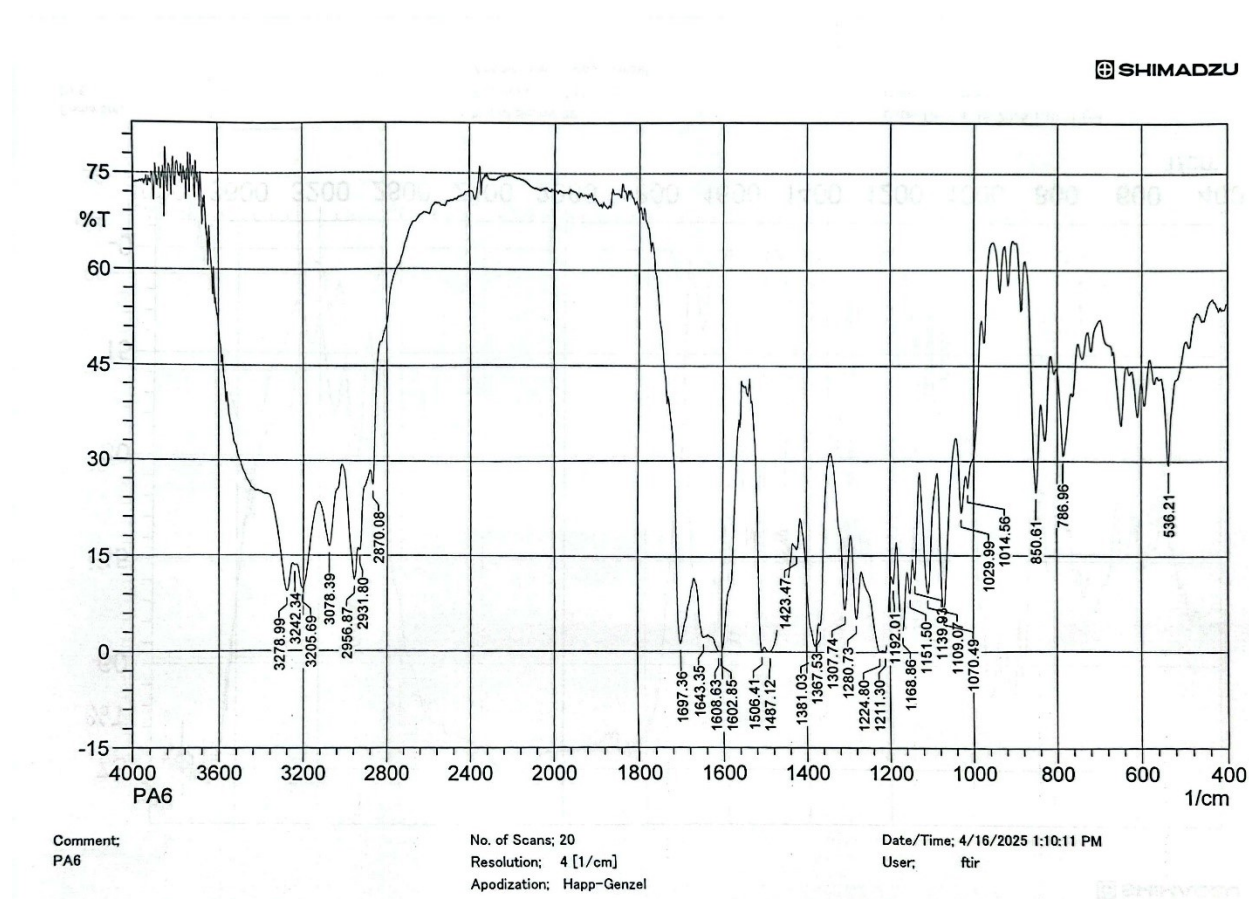

Figure S22. The IR spectrum of compound 7



8

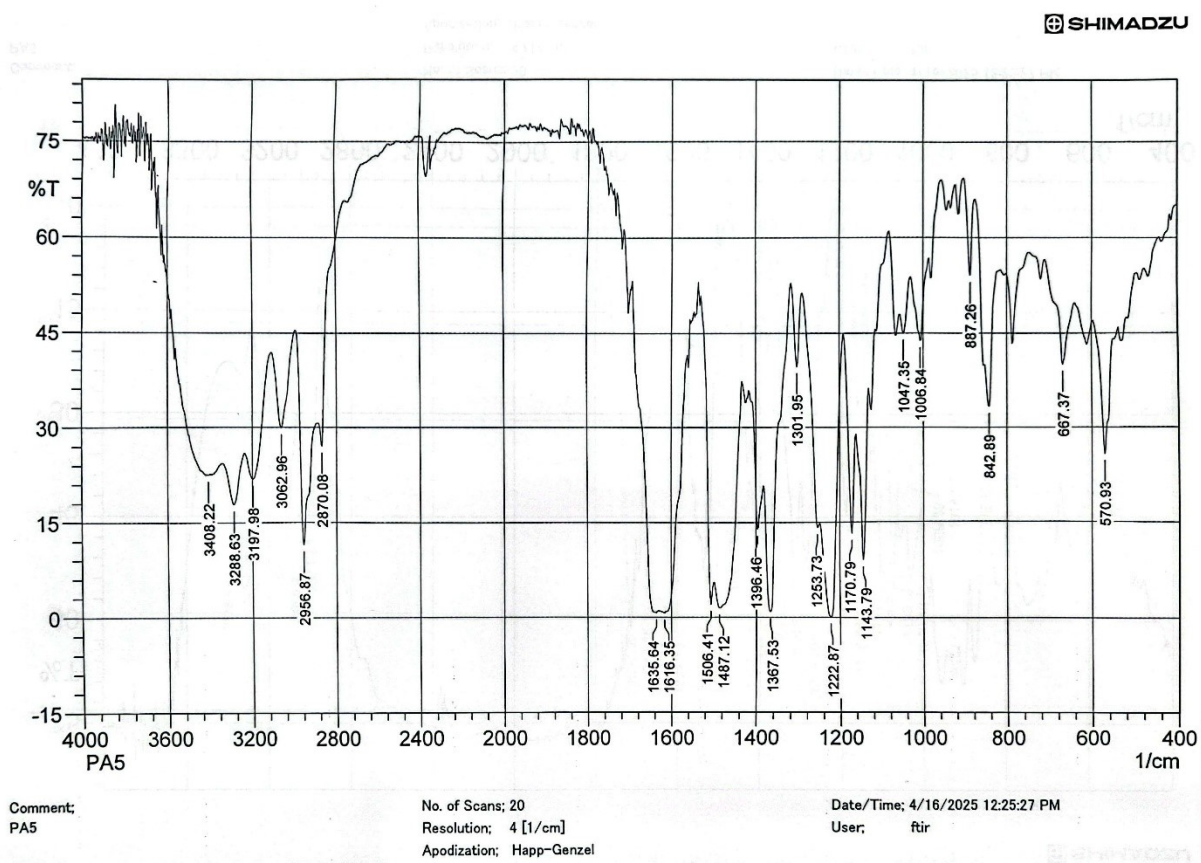

Figure S23. The IR spectrum of compound 8



SHIMADZU

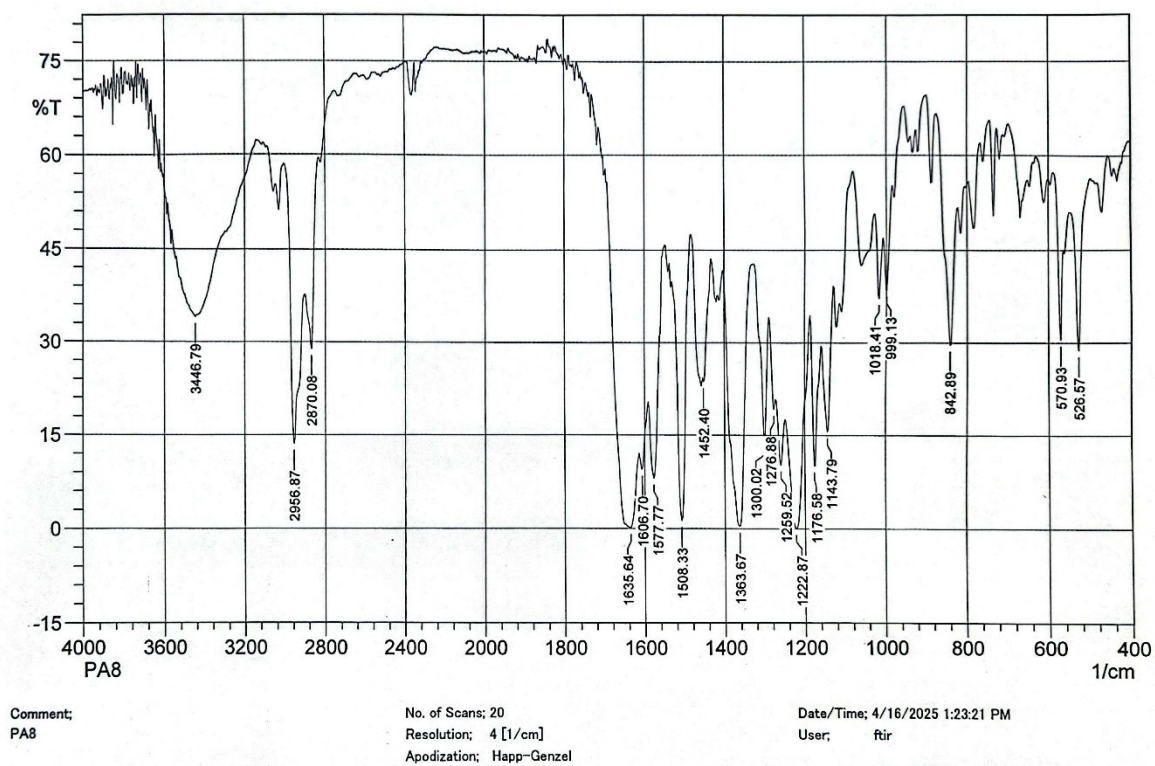

Figure S24. The IR spectrum of compound 11

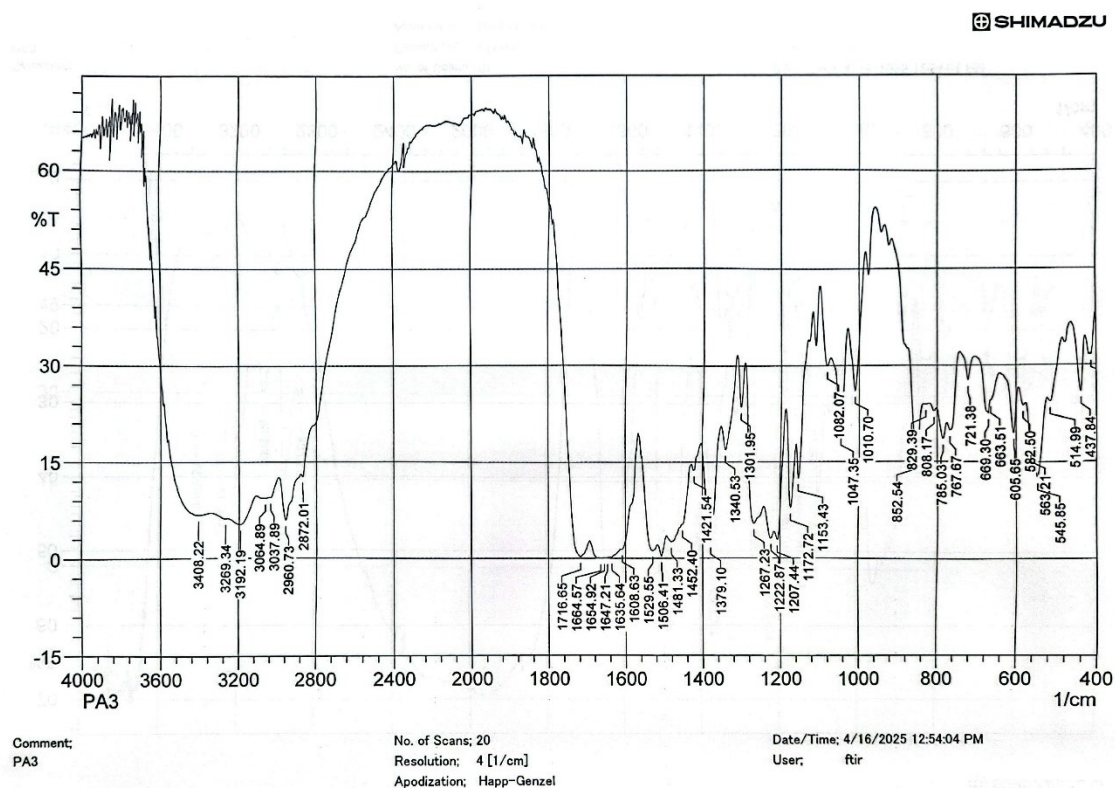

Figure S25. The IR spectrum of compound 15





16

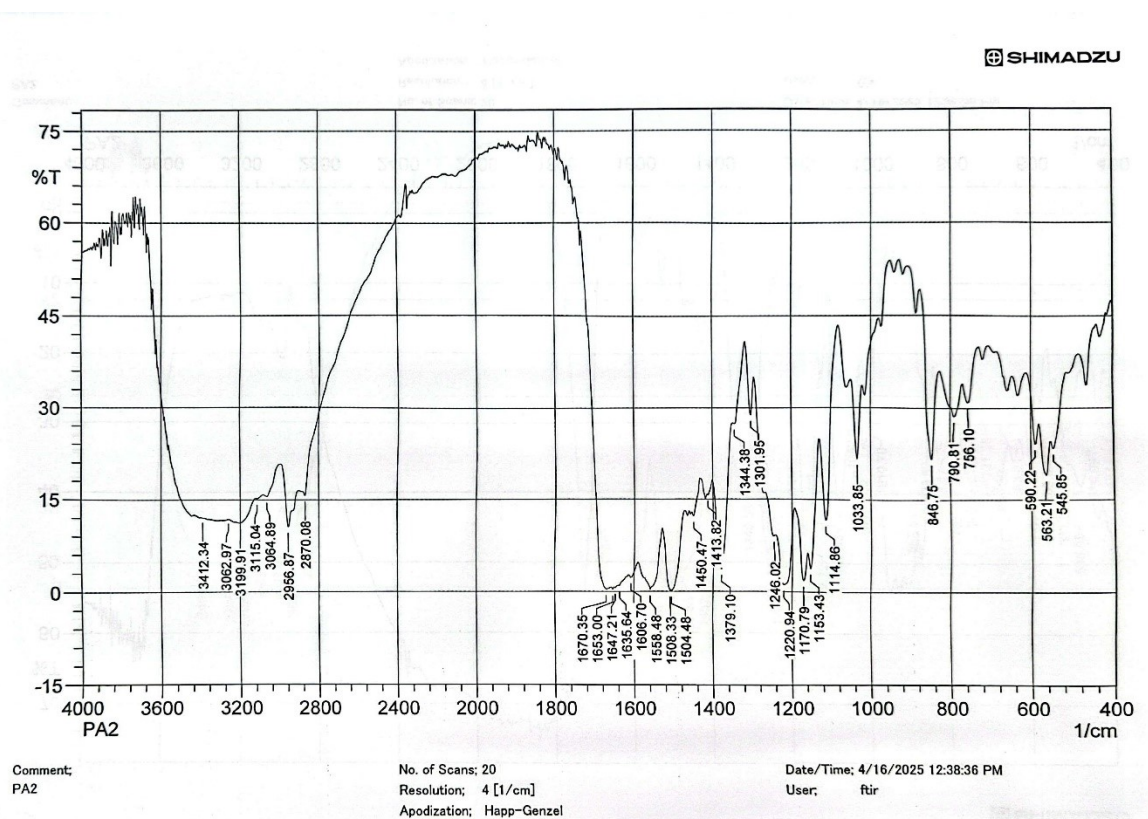

Figure S26. The IR spectrum of compound 16



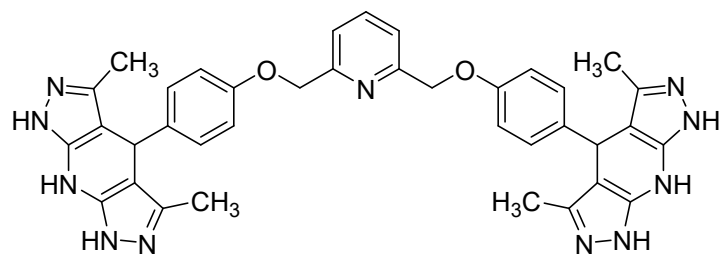

18

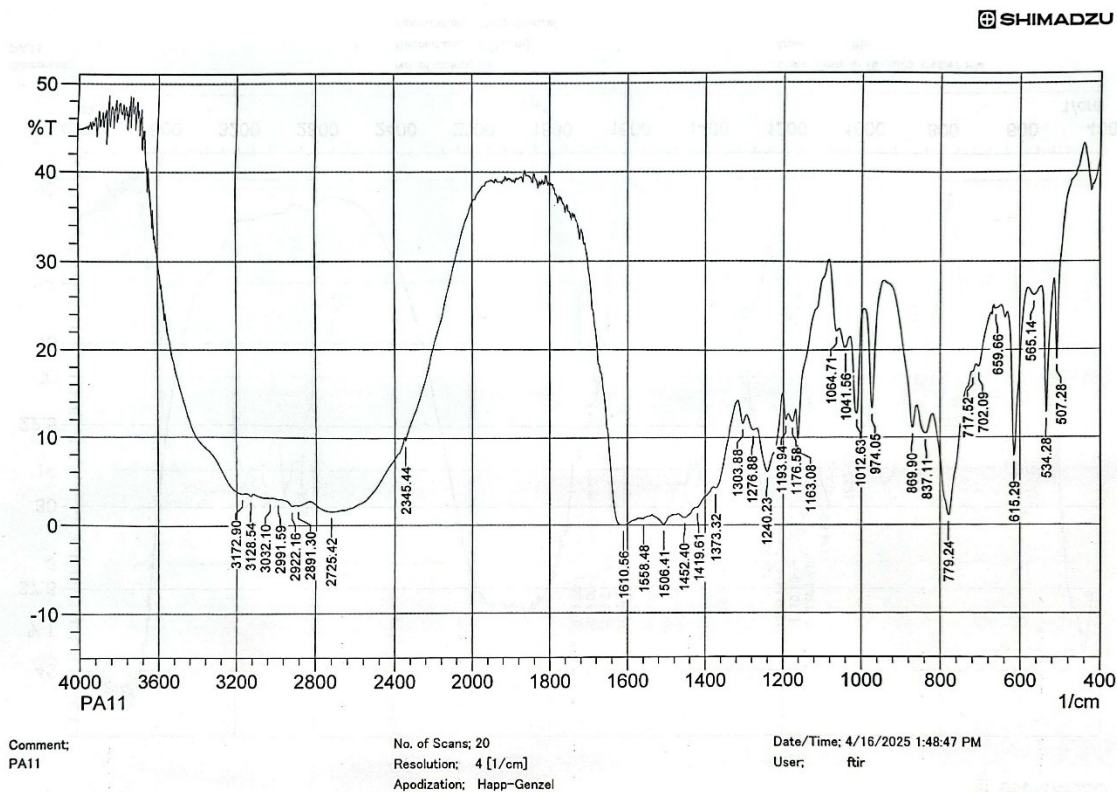

Figure S27. The IR spectrum of compound 18

**Table S1.** IC<sub>50</sub> values (μM) of novel derivatives (**7**, **8**, **11**, **15**, **16**, and **18**) toward different human cells, HepG2, A549, MCF7, and HFB4 cells, using MTT assay following 48 h of treatment.

| Compound             | IC <sub>50</sub> (μM) <sup>a</sup> |                |                |                | SI <sup>b</sup> |       |       |
|----------------------|------------------------------------|----------------|----------------|----------------|-----------------|-------|-------|
|                      | HepG2                              | A549           | MCF7           | HFB4           | HepG2           | A549  | MCF7  |
| <b>16 (PA2)</b>      | 46.83 ± 3.86                       | >118.76        | 95.84 ± 12.47  | > 118.76       | >2.53           | >1    | >1.24 |
| <b>15 (PA3)</b>      | 81.22 ± 2.31                       | 101.92 ± 8.40  | > 123.48       | > 123.48       | >1.52           | >1.21 | >1    |
| <b>8 (PA5)</b>       | 70.91 ± 10.23                      | 53.21 ± 21.39  | > 119.89       | 81.82 ± 5.67   | 1.15            | >1.53 | 0.68  |
| <b>7 (PA6)</b>       | 22.20 ± 1.44                       | 17.75 ± 4.58   | 37.95 ± 8.15   | > 122.85       | >5.53           | >6.92 | >3.23 |
| <b>11 (PA8)</b>      | 72.77 ± 14.68                      | > 98.59        | > 98.59        | > 98.59        | >1.35           | >1    | >1    |
| <b>18 (PA11)</b>     | 83.84 ± 11.16                      | 144.0 ± 5.42   | > 150.20       | > 150.20       | >1.79           | >1.04 | >1    |
| <b>5-Florouracil</b> | 349.40 ± 45.89                     | 369.01 ± 33.21 | 392.38 ± 88.25 | 679.05 ± 19.45 | 1.94            | 1.84  | 1.73  |

<sup>a</sup> The data was expressed as the mean ± SD of three independent experiments.

<sup>b</sup> SI = IC<sub>50</sub> on HFB4/IC<sub>50</sub> on cancer cells.
